# Supplementary material
Source: PubMed Central journal article supplement (PMC8740062)
Supplement: brc-0016-0637-s01.pdf [file brc-0016-0637-s01.pdf]

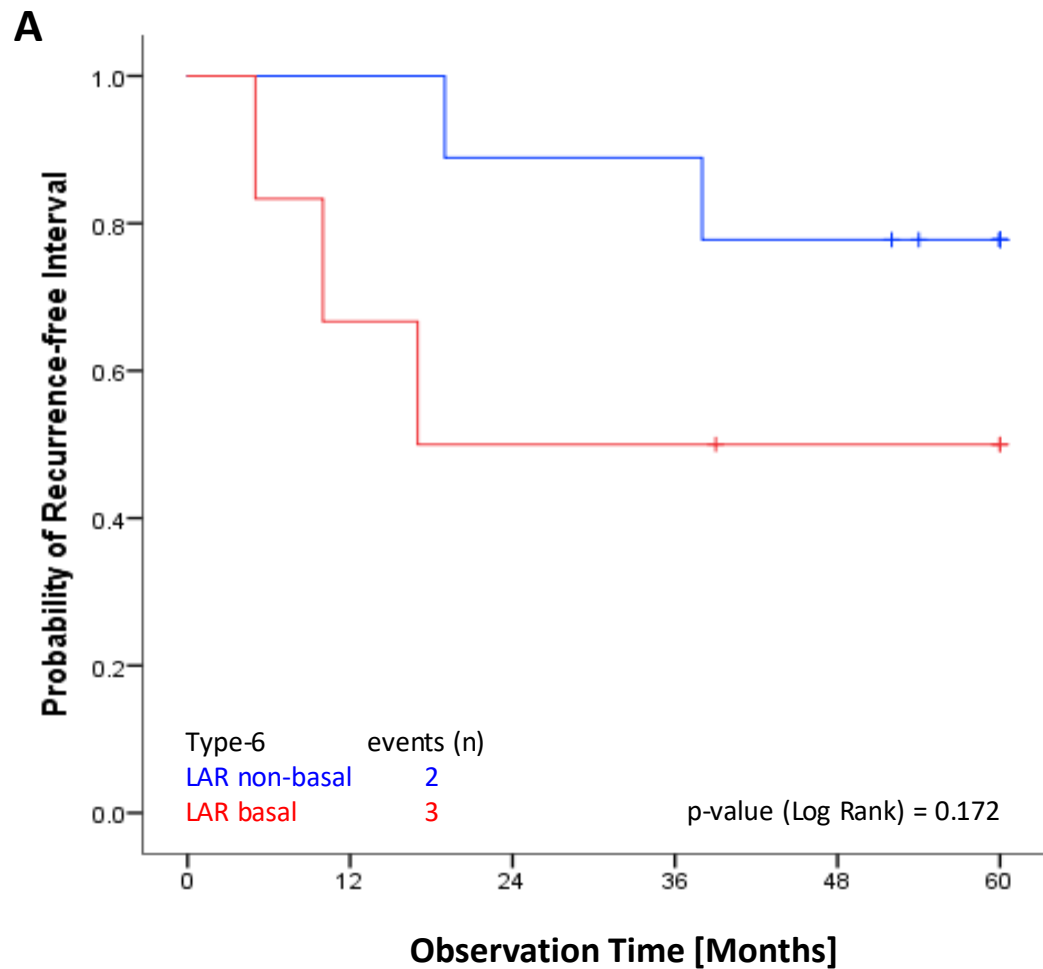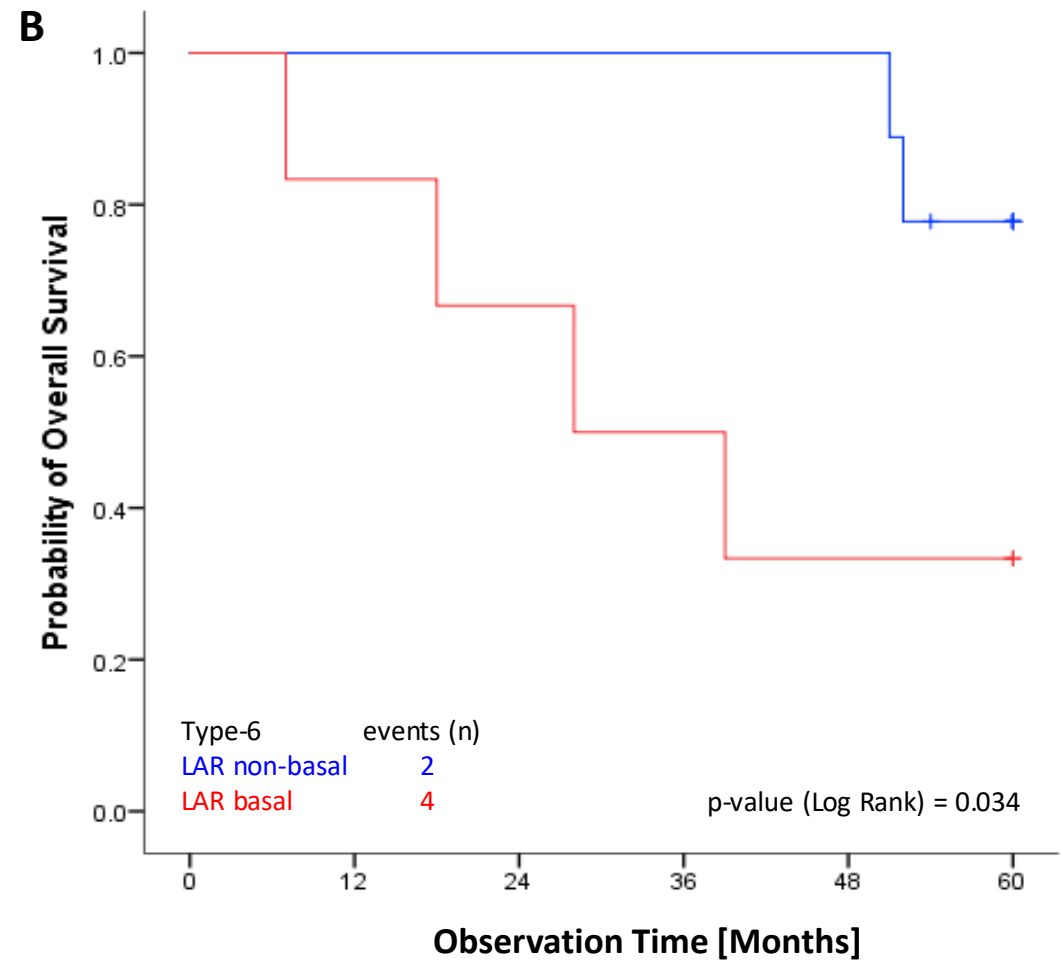

| No. at risk   | 15 | 13 | 11 | 11 | 9 | 5 |
|---------------|----|----|----|----|---|---|
| LAR non-basal | 9  | 9  | 8  | 8  | 7 | 4 |
| LAR basal     | 6  | 4  | 3  | 3  | 2 | 1 |

| No. at risk   | 15 | 14 | 13 | 12 | 11 | 6 |
|---------------|----|----|----|----|----|---|
| LAR non-basal | 9  | 9  | 9  | 9  | 9  | 5 |
| LAR basal     | 6  | 5  | 4  | 3  | 2  | 1 |

**Supplementary Fig. 1.** LAR non-basal and LAR-basal Kaplan-Meier plots for RFI (A) and OS (B) classified by TNBCtype-6, the tables present the effective sample size for each interval.

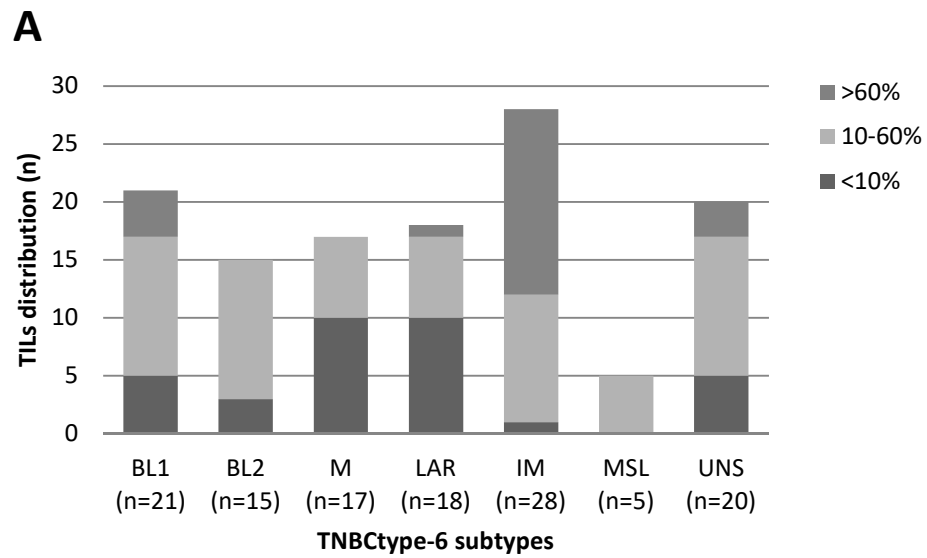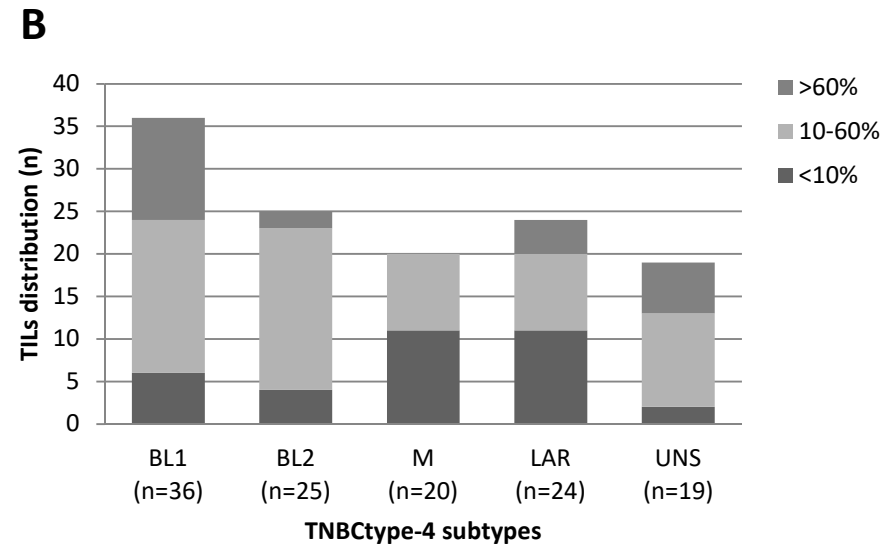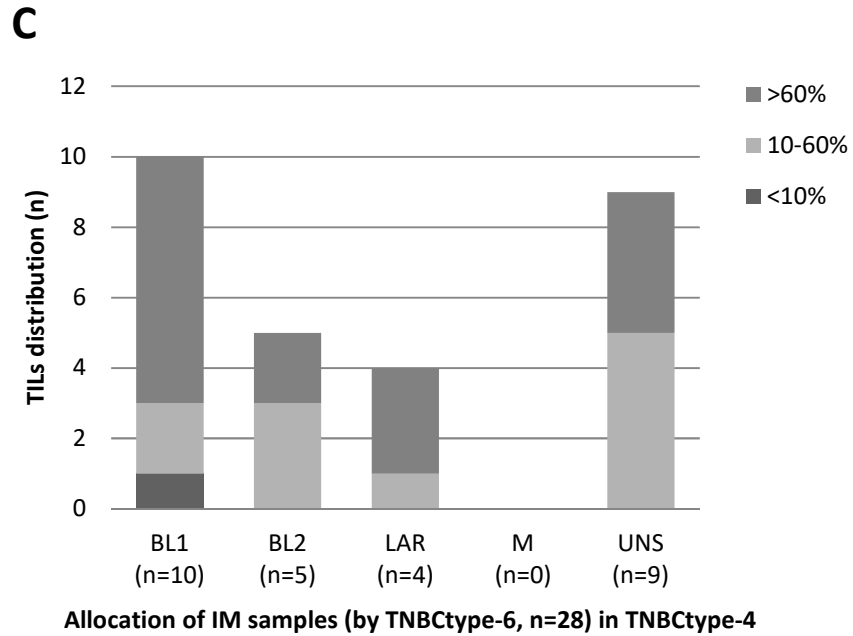

**Supplementary Fig. 2.** Distributions of TILs within TNBC subtype (n = 124).

**A** within the TNBCtype-6 subtypes

**B** within the TNBCtype-4 subtypes

**C** Allocation of IM samples (by TNBCtype-6, n=28) in TNBCtype-4

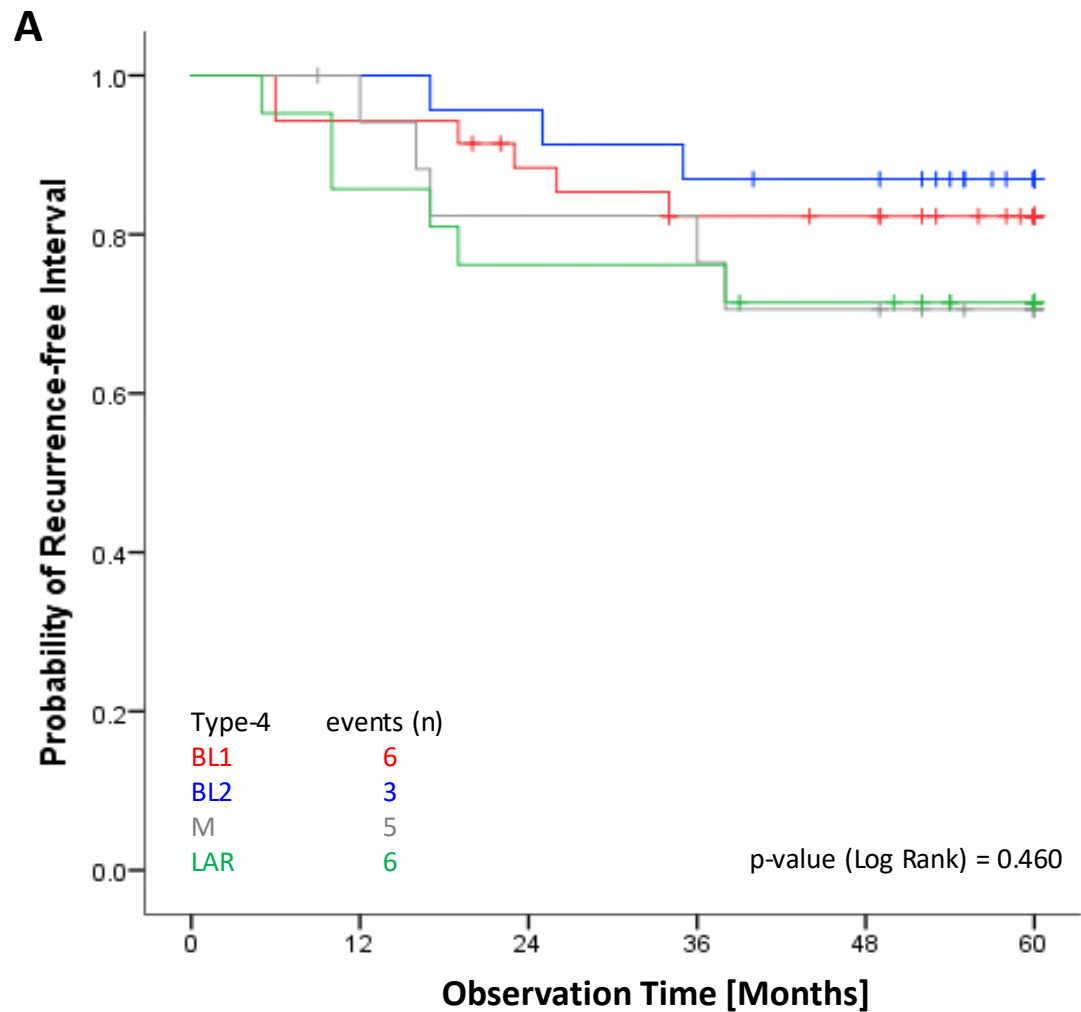

| No. at risk | 97 | 91 | 81 | 74 | 69 | 47 |
|-------------|----|----|----|----|----|----|
| BL1         | 35 | 33 | 29 | 25 | 24 | 17 |
| BL2         | 23 | 23 | 22 | 20 | 19 | 11 |
| M           | 18 | 17 | 14 | 13 | 12 | 9  |
| LAR         | 21 | 18 | 16 | 16 | 14 | 10 |

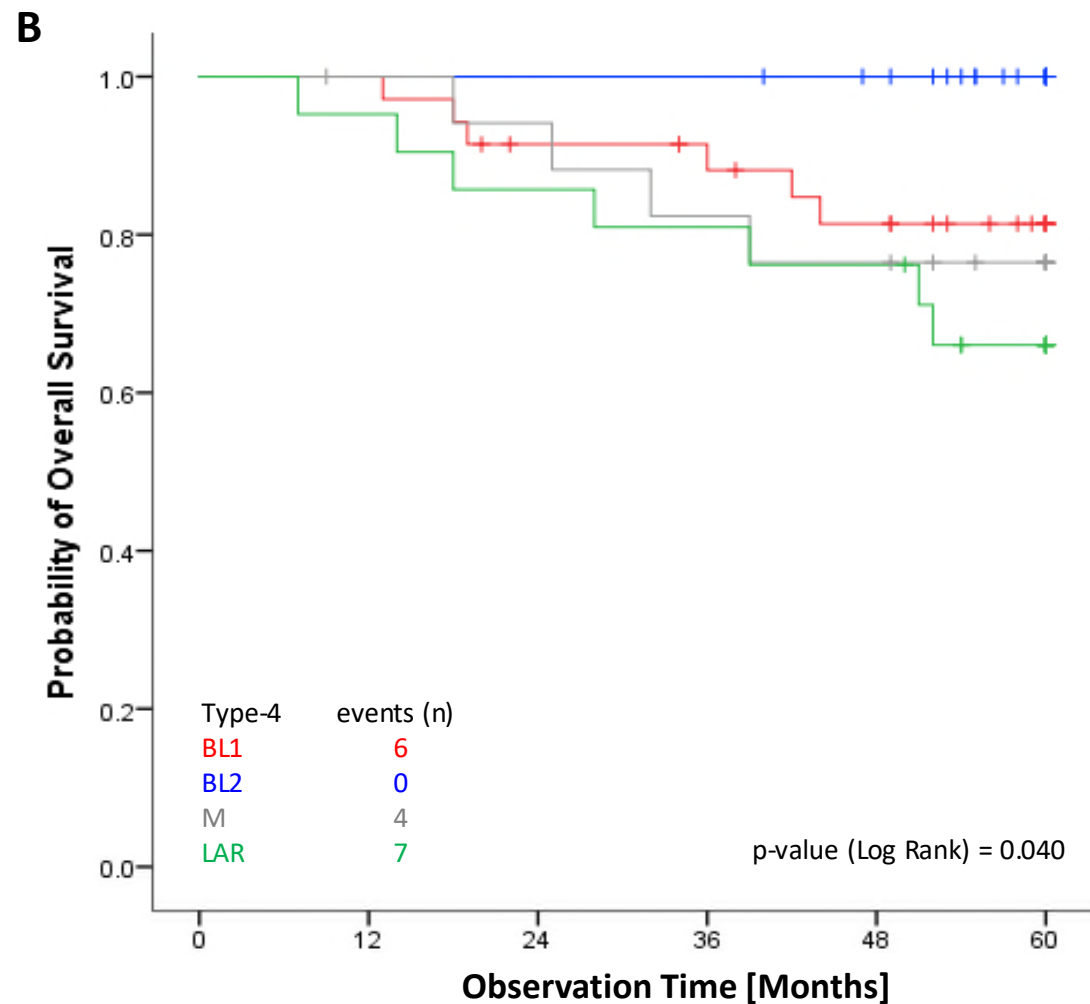

| No. at risk | 97 | 95 | 85 | 82 | 74 | 51 |
|-------------|----|----|----|----|----|----|
| BL1         | 35 | 35 | 30 | 28 | 24 | 17 |
| BL2         | 23 | 23 | 23 | 23 | 21 | 13 |
| M           | 18 | 17 | 14 | 14 | 13 | 10 |
| LAR         | 21 | 20 | 18 | 17 | 16 | 11 |

**Supplementary Fig. 3.** TNBCtype-4 Kaplan-Meier plots, the tables present the effective sample size for each interval.

**A, B:** all subdivided stable subtypes RFI (A) and OS (B)

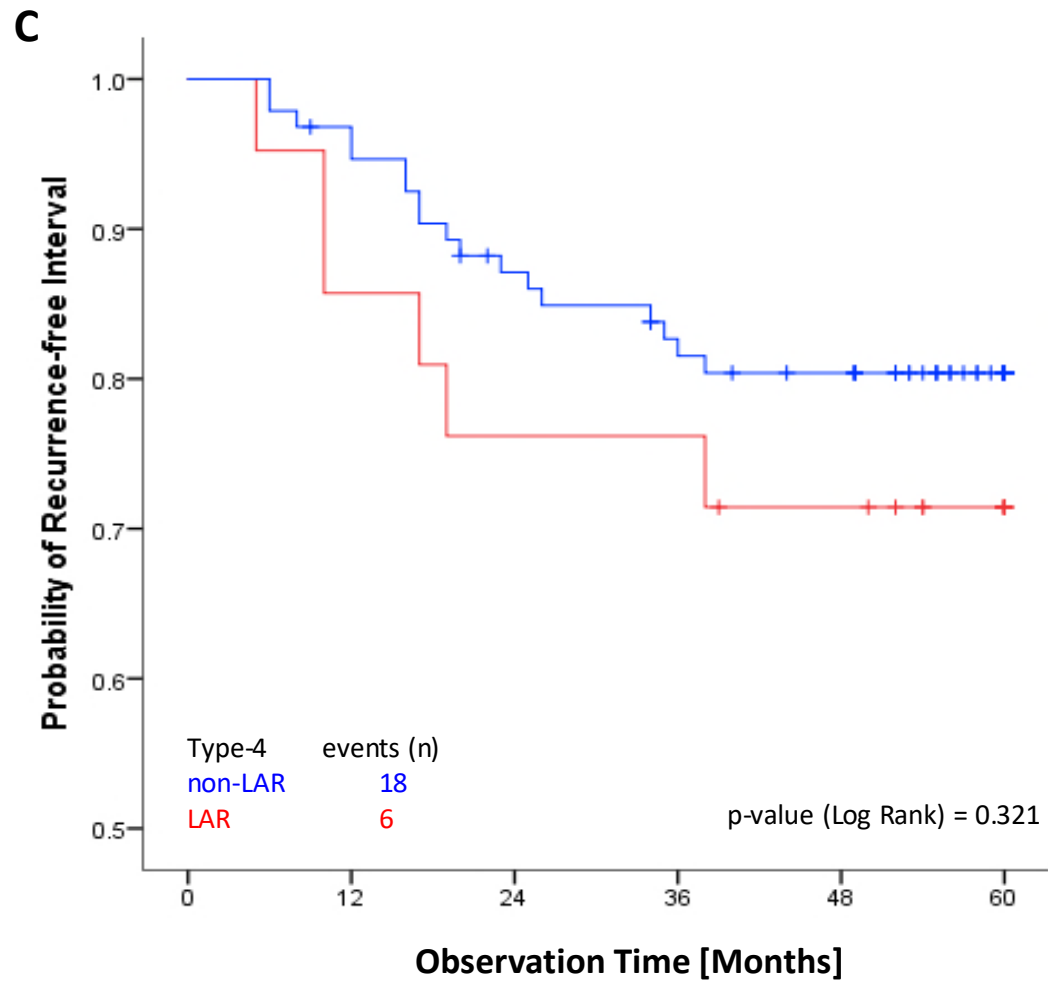

|             |     |     |    |    |    |    |
|-------------|-----|-----|----|----|----|----|
| No. at risk | 115 | 108 | 95 | 89 | 83 | 60 |
| non-LAR     | 94  | 90  | 79 | 73 | 69 | 50 |
| LAR         | 21  | 18  | 16 | 16 | 14 | 10 |

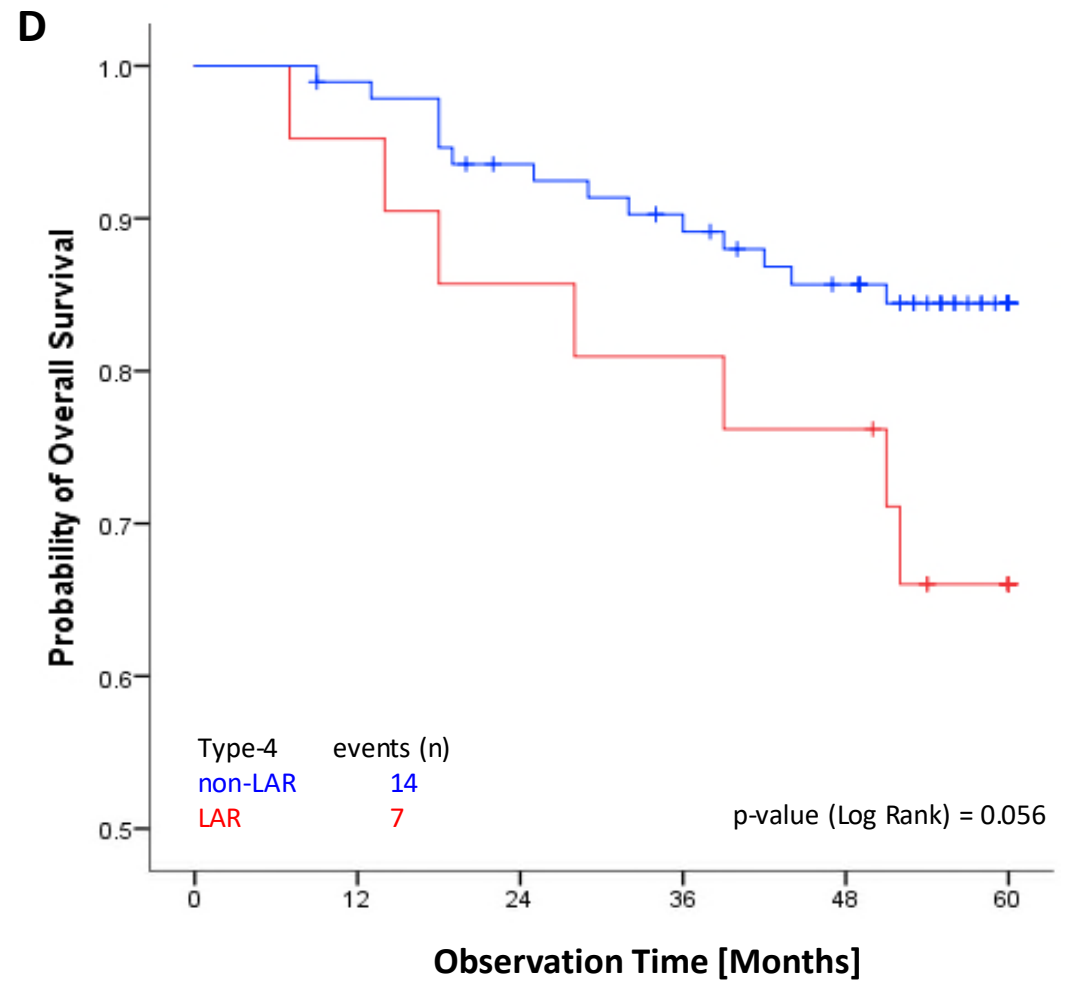

|             |     |     |     |    |    |    |
|-------------|-----|-----|-----|----|----|----|
| No. at risk | 115 | 112 | 103 | 97 | 89 | 64 |
| non-LAR     | 94  | 92  | 85  | 80 | 73 | 53 |
| LAR         | 21  | 20  | 18  | 17 | 16 | 11 |

**Supplementary Fig. 3.** TNBCtype-4 Kaplan-Meier plots, the tables present the effective sample size for each interval (No. at risk).

**C, D:** summarized groups LAR versus non-LAR subtypes RFI (C) and OS (D)

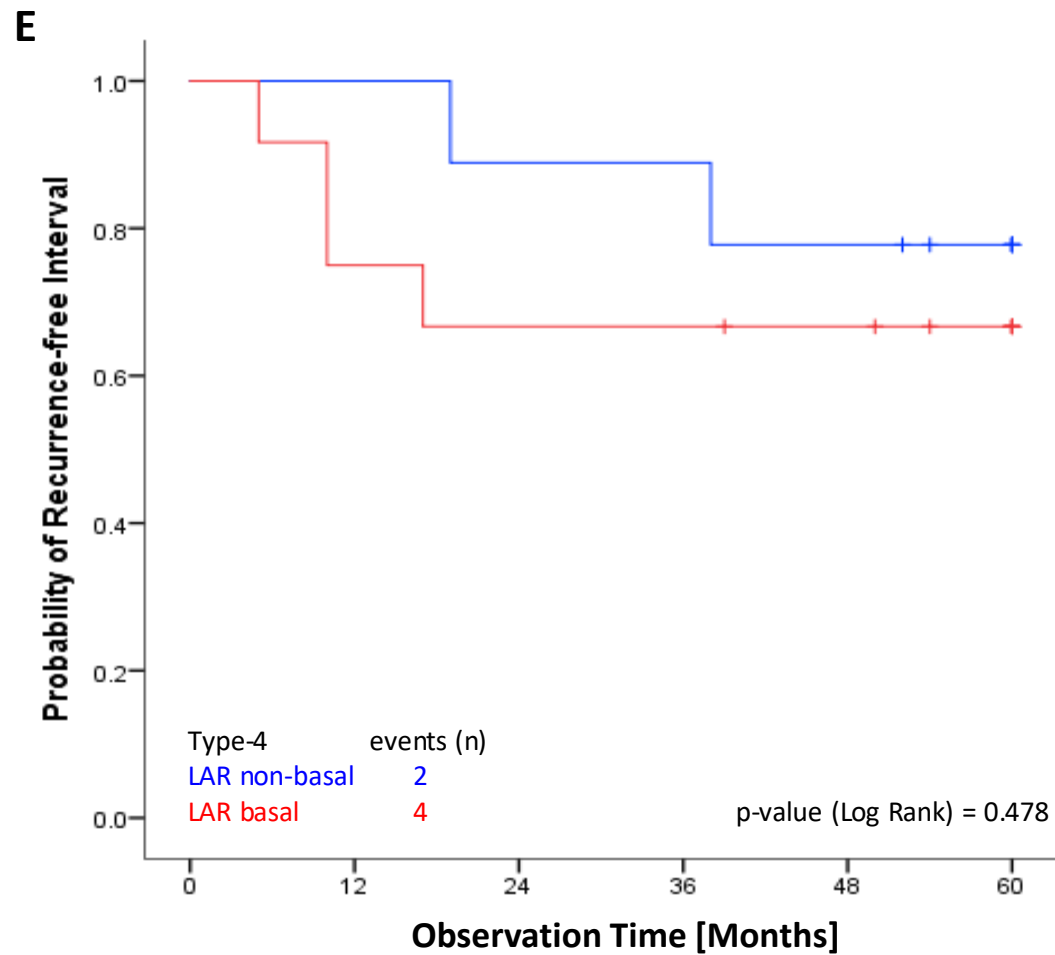

|               |    |    |    |    |    |    |
|---------------|----|----|----|----|----|----|
| No. at risk   | 21 | 18 | 16 | 16 | 14 | 10 |
| LAR non-basal | 9  | 9  | 8  | 8  | 7  | 5  |
| LAR basal     | 12 | 9  | 8  | 8  | 7  | 5  |

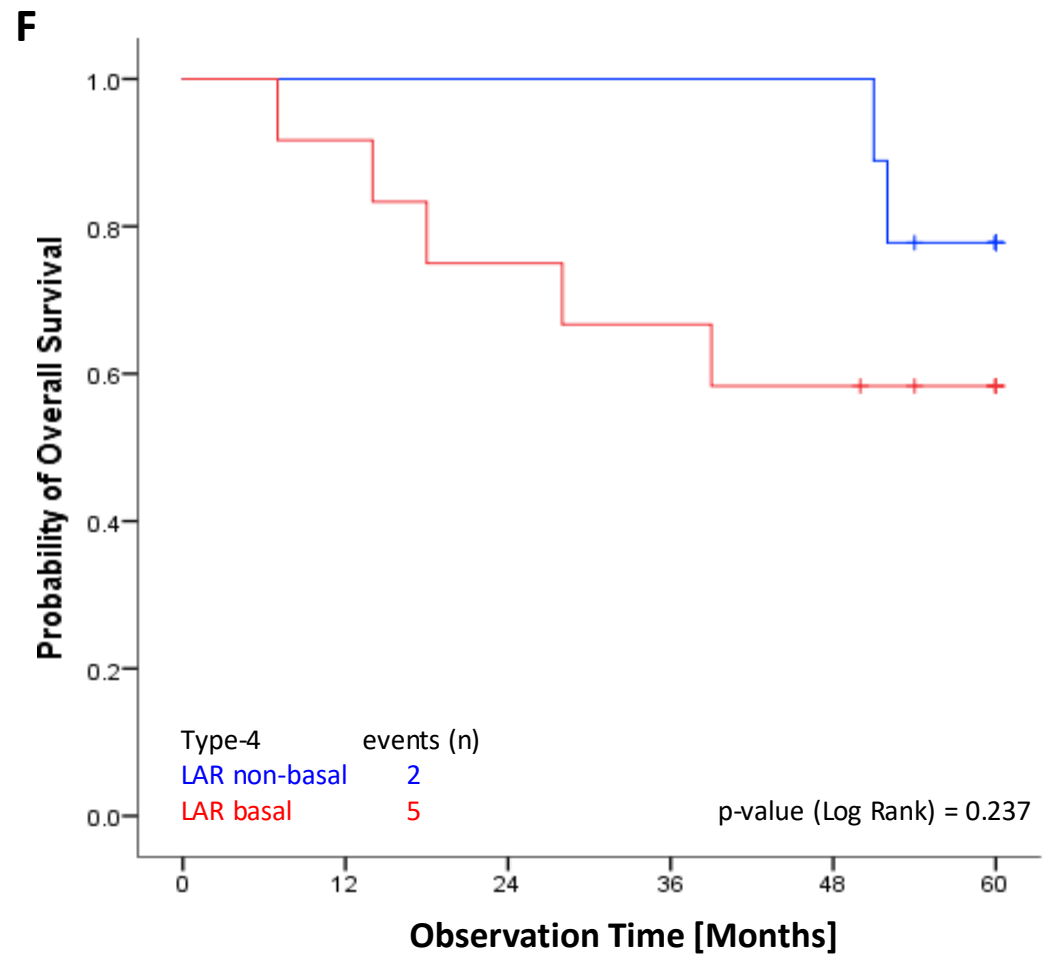

|               |    |    |    |    |    |   |
|---------------|----|----|----|----|----|---|
| No. at risk   | 21 | 20 | 18 | 17 | 16 | 7 |
| LAR non-basal | 9  | 9  | 9  | 9  | 9  | 6 |
| LAR basal     | 12 | 11 | 9  | 8  | 7  | 1 |

**Supplementary Fig. 3.** TNBCtype-4 Kaplan-Meier plots, the tables present the effective sample size for each interval-

E, F: LAR non-basal and LAR basal for RFI (E) and OS (F)

**Supplementary Table 1.** pCR rates [%] of patients treated with neoadjuvant chemotherapy

| <b>pCR definitions</b> | <b>all NACT<br/>n=200</b> | <b>TNBC<br/>n=54</b> | <b>non-TNBC<br/>n=146</b> | <b>TNBC subtyping<br/>n=33</b> | <b>TNBC basal<br/>n=27</b> | <b>TNBC non-basal<br/>n=6</b> | <b>TNBC LAR<br/>n=4</b> | <b>TNBC non-LAR<br/>n=29</b> |
|------------------------|---------------------------|----------------------|---------------------------|--------------------------------|----------------------------|-------------------------------|-------------------------|------------------------------|
| ypT0 ypN0 [%]          | 23.5                      | 44.4                 | 15.8                      | 42.4                           | 44.4                       | 33.3                          | 25.0                    | 44.8                         |
| ypT0/Tis ypN0 [%]      | 31.5                      | 48.1                 | 25.3                      | 48.5                           | 48.2                       | 50.0                          | 50.0                    | 48.2                         |
| ypT0/Tis ypN any [%]   | 40.0                      | 57.4                 | 33.6                      | 60.6                           | 63.0                       | 50.0                          | 50.0                    | 62.0                         |

**Supplementary Table 2.** Distribution of Molecular subtypes and PAM50 intrinsic types (A, B) and excluding unclassifiable subtypes (C).

| <b>A</b> | <b>sample ID</b> | <b>TNBCtype-6</b> | <b>TNBCtype-4</b> | <b>PAM50 intrinsic type</b> |
|----------|------------------|-------------------|-------------------|-----------------------------|
|          | 1                | M                 | M                 | basal-like                  |
|          | 2                | BL1               | BL1               | basal-like                  |
|          | 3                | BL1               | BL1               | basal-like                  |
|          | 4                | BL1               | BL1               | basal-like                  |
|          | 5                | BL2               | BL2               | basal-like                  |
|          | 6                | UNS               | UNS               | basal-like                  |
|          | 7                | BL2               | BL2               | basal-like                  |
|          | 8                | IM                | BL1               | basal-like                  |
|          | 9                | BL1               | BL1               | basal-like                  |
|          | 10               | BL1               | BL1               | basal-like                  |
|          | 11               | IM                | BL1               | basal-like                  |
|          | 12               | BL2               | BL2               | basal-like                  |
|          | 13               | BL1               | BL1               | basal-like                  |
|          | 14               | BL1               | BL1               | basal-like                  |
|          | 15               | BL1               | BL1               | basal-like                  |
|          | 16               | BL1               | BL1               | basal-like                  |
|          | 17               | IM                | BL1               | basal-like                  |
|          | 18               | UNS               | UNS               | basal-like                  |
|          | 19               | IM                | BL1               | basal-like                  |
|          | 20               | IM                | BL1               | basal-like                  |
|          | 21               | IM                | UNS               | basal-like                  |
|          | 22               | UNS               | UNS               | basal-like                  |
|          | 23               | M                 | M                 | basal-like                  |
|          | 24               | BL2               | BL2               | basal-like                  |
|          | 25               | M                 | M                 | basal-like                  |
|          | 26               | BL2               | BL2               | basal-like                  |
|          | 27               | BL1               | BL1               | basal-like                  |
|          | 28               | M                 | M                 | basal-like                  |
|          | 29               | BL1               | BL1               | basal-like                  |
|          | 30               | MSL               | LAR               | basal-like                  |
|          | 31               | UNS               | UNS               | basal-like                  |
|          | 32               | IM                | BL2               | basal-like                  |
|          | 33               | IM                | UNS               | basal-like                  |
|          | 34               | UNS               | BL2               | basal-like                  |
|          | 35               | UNS               | BL1               | basal-like                  |
|          | 36               | BL1               | BL1               | basal-like                  |
|          | 37               | BL2               | BL2               | basal-like                  |
|          | 38               | LAR               | LAR               | basal-like                  |
|          | 39               | LAR               | LAR               | HER2 enriched               |
|          | 40               | BL2               | BL2               | basal-like                  |
|          | 41               | BL1               | BL1               | basal-like                  |
|          | 42               | UNS               | UNS               | basal-like                  |
|          | 43               | LAR               | LAR               | basal-like                  |
|          | 44               | M                 | M                 | basal-like                  |
|          | 45               | IM                | BL1               | basal-like                  |
|          | 46               | LAR               | LAR               | HER2 enriched               |
|          | 47               | IM                | UNS               | basal-like                  |
|          | 48               | M                 | M                 | basal-like                  |
|          | 49               | UNS               | UNS               | basal-like                  |
|          | 50               | LAR               | LAR               | HER2 enriched               |
|          | 51               | BL1               | BL1               | basal-like                  |
|          | 52               | MSL               | M                 | basal-like                  |
|          | 53               | IM                | LAR               | basal-like                  |
|          | 54               | M                 | M                 | basal-like                  |
|          | 55               | MSL               | BL2               | basal-like                  |
|          | 56               | IM                | BL1               | basal-like                  |
|          | 57               | UNS               | UNS               | basal-like                  |
|          | 58               | BL1               | BL1               | basal-like                  |
|          | 59               | BL2               | BL2               | HER2 enriched               |

| sample ID | TNBCtype-6 | TNBCtype-4 | PAM50 intrinsic ttype |
|-----------|------------|------------|-----------------------|
| 60        | BL2        | BL2        | basal-like            |
| 61        | LAR        | LAR        | basal-like            |
| 62        | UNS        | UNS        | basal-like            |
| 63        | IM         | LAR        | basal-like            |
| 64        | IM         | LAR        | basal-like            |
| 65        | UNS        | BL1        | basal-like            |
| 66        | M          | M          | basal-like            |
| 67        | BL2        | BL2        | basal-like            |
| 68        | BL1        | BL1        | basal-like            |
| 69        | IM         | UNS        | basal-like            |
| 70        | LAR        | LAR        | basal-like            |
| 71        | LAR        | LAR        | HER2 enriched         |
| 72        | IM         | BL2        | basal-like            |
| 73        | M          | M          | basal-like            |
| 74        | UNS        | M          | basal-like            |
| 75        | M          | M          | basal-like            |
| 76        | BL1        | BL1        | basal-like            |
| 77        | LAR        | LAR        | basal-like            |
| 78        | MSL        | BL2        | HER2 enriched         |
| 79        | IM         | UNS        | basal-like            |
| 80        | LAR        | LAR        | Luminal A             |
| 81        | BL2        | BL2        | basal-like            |
| 82        | BL2        | BL2        | basal-like            |
| 83        | IM         | UNS        | basal-like            |
| 84        | LAR        | LAR        | HER2 enriched         |
| 85        | M          | M          | basal-like            |
| 86        | UNS        | UNS        | basal-like            |
| 87        | M          | M          | basal-like            |
| 88        | UNS        | BL1        | basal-like            |
| 89        | IM         | BL1        | basal-like            |
| 90        | LAR        | LAR        | basal-like            |
| 91        | UNS        | BL1        | basal-like            |
| 92        | M          | M          | basal-like            |
| 93        | IM         | UNS        | basal-like            |
| 94        | UNS        | UNS        | HER2 enriched         |
| 95        | BL2        | BL2        | basal-like            |
| 96        | M          | M          | basal-like            |
| 97        | M          | M          | basal-like            |
| 98        | IM         | UNS        | basal-like            |
| 99        | BL2        | BL2        | basal-like            |
| 100       | LAR        | LAR        | HER2 enriched         |
| 101       | IM         | UNS        | basal-like            |
| 102       | UNS        | M          | basal-like            |
| 103       | UNS        | BL1        | basal-like            |
| 104       | BL2        | BL2        | HER2 enriched         |
| 105       | MSL        | BL2        | Luminal A             |
| 106       | LAR        | LAR        | basal-like            |
| 107       | IM         | LAR        | basal-like            |
| 108       | LAR        | LAR        | Luminal A             |
| 109       | LAR        | LAR        | basal-like            |
| 110       | M          | M          | basal-like            |
| 111       | IM         | BL1        | basal-like            |
| 112       | LAR        | LAR        | basal-like            |
| 113       | IM         | BL2        | basal-like            |
| 114       | BL1        | BL1        | basal-like            |
| 115       | BL1        | BL1        | basal-like            |
| 116       | LAR        | LAR        | HER2 enriched         |
| 117       | BL2        | BL2        | basal-like            |
| 118       | BL1        | BL1        | basal-like            |
| 119       | BL1        | BL1        | basal-like            |
| 120       | IM         | BL2        | basal-like            |
| 121       | UNS        | LAR        | basal-like            |
| 122       | M          | M          | basal-like            |
| 123       | UNS        | BL2        | HER2 enriched         |
| 124       | IM         | BL1        | basal-like            |



**B**

|            | TNBCtype-6    | PAM50 intrinsic            |                               |
|------------|---------------|----------------------------|-------------------------------|
|            | n=124 (100 %) | basal-like<br>n=109 (88 %) | non basal-like<br>n=15 (12 %) |
| <b>BL1</b> | 21 (17 %)     | 21 (19 %)                  | 0 (0 %)                       |
| <b>BL2</b> | 16 (13 %)     | 14 (13 %)                  | 2 (13 %)                      |
| <b>M</b>   | 17 (14 %)     | 17 (16 %)                  | 0 (0 %)                       |
| <b>LAR</b> | 18 (15 %)     | 9 (8 %)                    | 9 (60 %)                      |
| <b>IM</b>  | 27 (22 %)     | 27 (25 %)                  | 0 (0 %)                       |
| <b>MSL</b> | 5 (4 %)       | 3 (3 %)                    | 2 (13 %)                      |
| <b>UNS</b> | 20 (16 %)     | 18 (16 %)                  | 2 (13 %)                      |

|            | TNBCtype-4    | PAM50 intrinsic types      |                               |
|------------|---------------|----------------------------|-------------------------------|
|            | n=124 (100 %) | basal-like<br>n=109 (88 %) | non basal-like<br>n=15 (12 %) |
| <b>BL1</b> | 36 (29 %)     | 36 (33 %)                  | 0 (0 %)                       |
| <b>BL2</b> | 25 (20 %)     | 20 (18 %)                  | 5 (33 %)                      |
| <b>M</b>   | 20 (16 %)     | 20 (18 %)                  | 0 (0 %)                       |
| <b>LAR</b> | 24 (20 %)     | 15 (14 %)                  | 9 (60 %)                      |
| <b>UNS</b> | 19 (15 %)     | 18 (17 %)                  | 1 (7 %)                       |

**C**

|            | TNBCtype-6    | PAM50 intrinsic           |                               |
|------------|---------------|---------------------------|-------------------------------|
|            | n=104 (100 %) | basal-like<br>n=91 (88 %) | non basal-like<br>n=13 (12 %) |
| <b>BL1</b> | 21 (20 %)     | 21 (23 %)                 | 0 (0 %)                       |
| <b>BL2</b> | 16 (15 %)     | 14 (15 %)                 | 2 (15 %)                      |
| <b>M</b>   | 17 (16 %)     | 17 (19 %)                 | 0 (0 %)                       |
| <b>LAR</b> | 18 (17 %)     | 9 (10 %)                  | 9 (69 %)                      |
| <b>IM</b>  | 27 (26 %)     | 27 (30 %)                 | 0 (0 %)                       |
| <b>MSL</b> | 5 (5 %)       | 3 (3 %)                   | 2 (15 %)                      |

|            | TNBCtype-4    | PAM50 intrinsic types     |                               |
|------------|---------------|---------------------------|-------------------------------|
|            | n=105 (100 %) | basal-like<br>n=91 (87 %) | non basal-like<br>n=14 (13 %) |
| <b>BL1</b> | 36 (34 %)     | 36 (39 %)                 | 0 (0 %)                       |
| <b>BL2</b> | 25 (24 %)     | 20 (22 %)                 | 5 (36 %)                      |
| <b>M</b>   | 20 (19 %)     | 20 (22 %)                 | 0 (0 %)                       |
| <b>LAR</b> | 24 (23 %)     | 15 (16 %)                 | 9 (64 %)                      |

**Supplementary Table 3.** Multivariate analysis of RFI and OS for TNBC patients with chemotherapy and available TNBCtype-4 subtyping (n = 115)

| Parameters                               | Recurrence-free interval (24 events) |            |         |                       |            |         | Overall survival (21 events) |            |         |                       |            |         |
|------------------------------------------|--------------------------------------|------------|---------|-----------------------|------------|---------|------------------------------|------------|---------|-----------------------|------------|---------|
|                                          | Univariate analysis                  |            |         | Multivariate analysis |            |         | Univariate analysis          |            |         | Multivariate analysis |            |         |
|                                          | HR                                   | 95% CI     | P value | HR                    | 95% CI     | P value | HR                           | 95% CI     | P value | HR                    | 95% CI     | P value |
| <b>Age at diagnosis in years</b>         |                                      |            |         |                       |            |         |                              |            |         |                       |            |         |
| ≤ 50                                     | 1.24                                 | 0.53-2.93  | 0.618   |                       |            |         | 1.22                         | 0.44-3.36  | 0.705   |                       |            |         |
| 51-75 (reference group)                  |                                      |            |         |                       |            |         |                              |            |         |                       |            |         |
| > 75                                     | 1.16                                 | 0.32-4.15  | 0.082   |                       |            |         | 3.48                         | 1.20-10.04 | 0.021   |                       |            |         |
| <b>Tumour size at time of diagnosis</b>  |                                      |            |         |                       |            |         |                              |            |         |                       |            |         |
| < 2cm (reference group)                  |                                      |            |         |                       |            |         |                              |            |         |                       |            |         |
| ≥ 2 cm                                   | 4.03                                 | 1.20-13.50 | 0.024   | 3.33                  | 0.96-11.58 | 0.058   | 5.46                         | 1.27-23.44 | 0.022   | 4.00                  | 0.89-17.89 | 0.070   |
| <b>Nodal status at time of diagnosis</b> |                                      |            |         |                       |            |         |                              |            |         |                       |            |         |
| negative (reference group)               |                                      |            |         |                       |            |         |                              |            |         |                       |            |         |
| positive                                 | 2.74                                 | 1.13-6.60  | 0.025   | 2.09                  | 0.84-5.18  | 0.109   | 4.73                         | 1.59-14.07 | 0.005   | 3.42                  | 1.12-10.49 | 0.031   |
| <b>Tumour differentiation</b>            |                                      |            |         |                       |            |         |                              |            |         |                       |            |         |
| G1, G2 (reference group)                 |                                      |            |         |                       |            |         |                              |            |         |                       |            |         |
| G3                                       | 0.49                                 | 0.22-1.09  | 0.082   |                       |            |         | 0.63                         | 0.27-1.49  | 0.293   |                       |            |         |
| <b>TNBCtype-4</b>                        |                                      |            |         |                       |            |         |                              |            |         |                       |            |         |
| non LAR (reference group)                |                                      |            |         |                       |            |         |                              |            |         |                       |            |         |
| LAR                                      | 1.58                                 | 0.63-4.00  | 0.327   | 1.74                  | 0.69-4.40  | 0.238   | 2.36                         | 0.95-5.84  | 0.064   | 2.62                  | 1.05-6.50  | 0.038   |

Abbreviation: CI Confidence Interval, HR Hazard Ratio, LAR Luminal Androgen Receptor
